# Supplementary material for: Allele-Specific KRT1 Expression Is a Complex Trait
Source: PLOS journal article supplement (doi:10.1371/journal.pgen.0020093), 2006-06-06
Supplement: S2 (10.1371/journal.pgen.0020093.s002) [file journal.pgen.0020093.s002]

| Supplementary Table 2: KRT1 interval haplotype patterns in the 23 haploid Coriell DNA Polymorphism Discovery Resource samples | | | | | | | | | | | | | | | | | | | | | | | | | | | | | | |
| --- | --- | --- | --- | --- | --- | --- | --- | --- | --- | --- | --- | --- | --- | --- | --- | --- | --- | --- | --- | --- | --- | --- | --- | --- | --- | --- | --- | --- | --- | --- |
| Haplo-type pattern | Freq.1  (%) | SNP number | | | | | | | | | | | | | | | | | | | | | | | | | | | | |
| **1** | **2**2,3 | **3** | **4** | **5**3 | **6**3 | **7** | **8** | **9** | **10** | **11**3 | **12** | **13** | **14** | **15** | **16** | **17**3 | **18** | **19** | **20** | **21** | **22** | **23**3 | **24** | **25** | **26** | **27** | **283** | **29** |
| 14 | 21.7 | T | G | G | A | T | T | T | A | T | C | T | C | C | A | C | A | G | G | G | G | N | T | C | T | G | A | A | C | T |
| 25 | 30.4 | A | A | G | T | C | G | C | A | C | T | C | C | G | G | C | G | A | G | T | G | C | C | A | T | A | A | G | A | T |
| 36 | 8.7  13.0  4.3  4.3 | A | A | A | T | C | T | T | G | T | C | T | T | G | G | T | G | G | A | G | G | T | T | C | T | G | C | G | C | C |
| A | A | A | T | C | T | T | G | T | C | T | T | G | G | T | G | G | A | G | G | T | T | C | C | G | C | G | C | C |
| A | A | G | T | C | T | T | N | T | C | T | C | G | G | C | G | G | G | G | G | N | T | C | T | G | A | G | C | T |
| A | A | G | T | C | T | T | A | T | C | T | C | G | G | C | G | G | G | G | G | C | T | C | T | G | A | G | C | N |
| 47 | 8.7  4.3 | A | A | G | T | C | T | C | A | C | T | C | C | G | G | C | G | A | G | T | A | C | C | A | T | G | C | G | C | C |
| A | A | G | T | C | T | C | A | C | T | C | C | G | G | C | G | A | G | T | A | C | C | A | T | N | A | G | N | T |
| 5 | 4.3 | T | A | G | A | T | T | T | N | T | C | N | N | C | A | C | A | G | G | N | G | N | T | C | N | N | A | G | N | N |
| 1 Frequency of haplotype pattern in the 23 haploid genomes from the Coriell DNA Polymorphism Discovery Resource (see accompanying Legend)  2 Exonic SNP assayed for allelic expression differences  3 These seven SNPs are KRT1 haplotype block tagging SNPs that together differentiate between the five major haplotype patterns.  4 Pattern number 1 is the low-expressing haplotype pattern as determined by differential allelic-expression of SNP2 in the heterozygous blood samples.  5 Pattern number 2 is the high-expressing haplotype pattern as determined by differential allelic-expression of SNP2 in the heterozygous blood samples.  6 The four haplotypes that make up haplotype pattern number 3 are minor variants on each other.  7 The two haplotypes that make up haplotype pattern number 4 are minor variants on each other. | | | | | | | | | | | | | | | | | | | | | | | | | | | | | | |
